# Supplementary material
Source: PubMed Central journal article supplement (PMC5896757)

## Supporting Information for Publication

### Assessment of extracellular vesicles purity using proteomic standards

Tingting Wang<sup>‡#</sup>, Kyle W. Anderson<sup>‡,#</sup>, and Illarion V. Turko<sup>‡,#,\*</sup>

<sup>‡</sup>Biomolecular Measurement Division, National Institute of Standards and Technology,  
Gaithersburg, Maryland 20899, United States

<sup>#</sup>Institute for Bioscience and Biotechnology Research, Rockville, Maryland 20850,  
United States

---

#### Table of Contents (Supporting Information)

**Table S1.** Transitions used for quantification.

**Table S2.** <sup>15</sup>N incorporation in EXO1 and EXO2 QconCATs.

**Table S3.** Identification of proteins in silver-stained gel bands marked in Figure 1.

**Figure S1.** EXO1 and EXO2 QconCATs.

**Figure S2.** A 9 % SDS-PAGE of purified EXO1 and EXO2.

**Figure S3.** Scheme depicting basic and precipitation-based protocols.

**Table S1.** Transitions used for quantification.

| Protein                   | Peptide           |   | Precursor<br>(m/z) | Product Ions (m/z) |             |              |
|---------------------------|-------------------|---|--------------------|--------------------|-------------|--------------|
|                           |                   |   |                    | 1                  | 2           | 3            |
| albumin                   | LVNEVTEFAK        | L | 573.1              | 694.4 (y6)         | 823.4 (y7)  | 937.5 (y8)   |
|                           |                   | H | 581.3              | 701.4 (y6)         | 831.4 (y7)  | 947.4 (y8)   |
|                           | VFDEFKPLVEEPQNLIK | L | 682.4              | 777.9 (y13)        | 842.5 (y14) | 900.0 (y15)  |
|                           |                   | H | 689.3              | 786.4 (y13)        | 851.4 (y14) | 909.5 (y15)  |
| $\alpha$ -2-macroglobulin | QTALVELVK         | L | 500.8              | 587.4 (y5)         | 700.5 (y6)  | 771.5 (y7)   |
|                           |                   | H | 506.3              | 593.4 (y5)         | 707.4 (y6)  | 779.5 (y7)   |
|                           | LVHVEEPHTETVR     | L | 773.4              | 839.4 (y7)         | 968.5 (y8)  | 1097.52 (y9) |
|                           |                   | H | 783.4              | 851.4 (y7)         | 981.4 (y8)  | 1111.5 (y9)  |
| Transferrin               | LPPNVVEESAR       | L | 605.8              | 691.3 (y6)         | 789.4 (y7)  | 1000.5 (y9)  |
|                           |                   | H | 613.3              | 699.3 (y6)         | 799.4 (y7)  | 1013.5 (y9)  |
| apoE                      | DGAGDVAFVK        | L | 489.7              | 563.4 (y5)         | 678.4 (y6)  | 806.4 (y8)   |
|                           |                   | H | 495.2              | 569.3 (y5)         | 685.4 (y6)  | 815.4 (y8)   |
| HSPA8                     | LGPLVEQGR         | L | 484.8              | 489.2 (y4)         | 588.3 (y5)  | 701.4 (y6)   |
|                           |                   | H | 491.2              | 497.2 (y4)         | 597.2 (y5)  | 711.4 (y6)   |
| moesin                    | FEELNADLFR        | L | 627.3              | 735.3 (y6)         | 848.5 (y7)  | 977.5 (y8)   |
|                           |                   | H | 634.3              | 745.3 (y6)         | 859.4 (y7)  | 989.5 (y8)   |
| HSP90AA1                  | IGFPWSEIR         | L | 552.8              | 690.4 (y5)         | 787.4 (y6)  | 991.5 (y8)   |
|                           |                   | H | 559.3              | 699.3 (y5)         | 797.4 (y6)  | 1003.5 (y8)  |
| EHD4                      | ADLINNLGTIAK      | L | 621.9              | 716.4 (y7)         | 830.5 (y8)  | 943.6 (y9)   |
|                           |                   | H | 629.3              | 725.4 (y7)         | 841.4 (y8)  | 955.5 (y9)   |
| flotillin-1               | SISVIDSPGILSGEK   | L | 751.4              | 800.5 (y8)         | 887.5 (y9)  | 1002.5 (y10) |
|                           |                   | H | 759.4              | 809.4 (y8)         | 897.5 (y9)  | 1013.5 (y10) |
| HDAC1,2                   | VTGEVLDILTR       | L | 608.4              | 617.4 (y5)         | 730.4 (y6)  | 829.5 (y7)   |
|                           |                   | H | 615.3              | 625.3 (y5)         | 739.4 (y6)  | 839.5 (y7)   |
| HSP90AB1                  | YGEYFPGTGDLR      | L | 687.8              | 715.4 (y7)         | 862.4 (y8)  | 1025.5 (y9)  |
|                           |                   | H | 695.3              | 725.3 (y7)         | 873.4 (y8)  | 1037.5 (y9)  |
| TSG101                    | YESLTDPSK         | L | 520.3              | 547.3 (y5)         | 660.4 (y6)  | 747.4 (y7)   |
|                           |                   | H | 525.2              | 553.3 (y5)         | 667.3 (y6)  | 755.4 (y7)   |
| DNAJB1                    | ASLISAVSDK        | L | 495.8              | 519.3 (y5)         | 606.3 (y6)  | 719.4 (y7)   |
|                           |                   | H | 501.3              | 525.3 (y5)         | 613.3 (y6)  | 727.4 (y7)   |
| L1CAM                     | DGSDVIYPAR        | L | 546.8              | 619.4 (y5)         | 718.4 (y6)  | 833.5 (y7)   |
|                           |                   | H | 553.3              | 627.3 (y5)         | 727.4 (y6)  | 843.4 (y7)   |
| L1CAM                     | DATQITQGPR        | L | 543.8              | 558.3 (y5)         | 671.4 (y6)  | 799.4 (y7)   |
|                           |                   | H | 551.3              | 567.3 (y5)         | 681.4 (y6)  | 811.4 (y7)   |

Transitions are listed for both unlabeled, light (L) and fully  $^{15}\text{N}$ -labeled, heavy (H) peptides. All precursors were +2 charge and product ions were +1 charge. Additionally, y-ion information is included for reference.

**Table S2.** <sup>15</sup>N-incorporation in EXO1 and EXO2 QconCATs.

| QconCAT | Peptide     | <sup>15</sup> N-incorporation <sup>a</sup> (%) | Average <sup>b</sup> (%) |
|---------|-------------|------------------------------------------------|--------------------------|
| EXO1    | LPPNVVEESAR | 99.92                                          |                          |
| EXO1    | LVNEVTEFAK  | 99.13                                          | 99.66 ± 0.27             |
| EXO1    | VTGEVLDILTR | 99.94                                          |                          |
| EXO2    | DKPHNIFK    | 99.98                                          |                          |
| EXO2    | YESLTDPSK   | 99.96                                          | 99.74 ± 0.27             |
| EXO2    | FEELNADLFR  | 99.29                                          |                          |

<sup>a</sup>Mean value based on three transitions per peptide. <sup>b</sup>Average was calculated based on 3 peptides in each QconCAT.

**Table S3.** Identification of proteins in silver-stained gel bands marked in Figure 1

| Band and protein <sup>a</sup>                          | Nominal Mass (kDa) | Sequence coverage (%) | Score <sup>b</sup> |
|--------------------------------------------------------|--------------------|-----------------------|--------------------|
| P1. alpha-2-macroglobulin (224053)                     | 160                | 7                     | 88(76)             |
| P2. alpha-2-macroglobulin (224053)                     | 160                | 9                     | 102(76)            |
| P3. albumin (178345)                                   | 69                 | 27                    | 253(76)            |
| P4. immunoglobulin mu heavy chain, partial (390994295) | 66                 | 16                    | 147(76)            |
| P5. chain B, Igg1 Fc fragment (401817558)              | 24                 | 30                    | 285(76)            |
| P6. anti-HBsAg immunoglobulin Fab kappa chain(3721651) | 24                 | 14                    | 119(76)            |

<sup>a</sup>The number in parenthesis is a NCBI GI number

<sup>b</sup>MOWSE score from Mascot software

([http://www.matrixscience.com/search\\_form\\_select.html](http://www.matrixscience.com/search_form_select.html)). The number in parenthesis is the score at which statistical significance ( $p < 0.05$ ) occurred for that particular search.

## Figure S1. EXO1 and EXO2 QconCATs

**EXO1** - Number of amino acids: 592; Molecular weight: 66686.19; Theoretical pI: 9.30  
Grand average of hydropathicity (GRAVY): -0.323

MTSTTLK**LSPYVHYTFR**VTAINPIDKK**APDFVFYAPRL**RINKRELISR**LPEIYIQLQREYQI**  
SASVRI**RGEAEFAIGARARAEAEVNTRRAQADLAYQLQVAKTKQQIERQIKKQTALVE**  
**LVKHKPKATIGA**AK**VTGEVLDILTRL**PESVENLANR**SHAELETALRDSSRVLFDAHKLDI**  
**SDEFSEAIKAF**RGQDRLTPK**IGFPWSEIR**NISFNDVVESRA**QLLVGSPGPVPR**LVLS  
LAFVAAR**SFVQGLGVASDVVR**KVAQVPNQVLK**SISVIDSPGILSGEKQRIS**RGFIQTRG  
**GTFYVEPAERY**YIKDRTGRGHAR**LHVVEEPHTETVR**KYFPETGEALRR**GVIDLDVFLKH**  
VRLLEDITIR**ASLISAVSDKLR**WRIKEELSLK**LPPNVVEESARASVSVLHEAYAKVFDEF**  
**KPLVEEPQNLIKQNAEL**FEDHV**KLVNEVTEFAKT**VADEANL**KVKDATQITQGPR**STIEK  
KVDANGKI**YLPYLHEWKHPQSDLHQR**AKR**AVSHEDQFLRLDFHAHQIYGAKGFS**LSDV  
**PQAEISGEHLRIAPQGYWILADKSSFISVLQTSSSSLR**IGAYVF**KLAAALEHHHHHH**

Peptides (marked red) with 6 a.a. residues flanking sequences on both sides (marked black) from 10 proteins listed below were randomly concatenated in EXO1 sequence. 4 Cys were replaced with Ala (marked green) and 4 Met were replaced with Ile (marked blue) in the flanking sequences. 6 x His tag and linker sequence (marked orange) was from expression vector.

### **Albumin**

1. FEDHV**KLVNEVTEFAKT**CVADE
2. HECYAK**VDFEFKPLVEEPQNLIKQ**NCELF
3. ERQIK**KQTALVELLVKHKPKAT**

### **Alpha-2-macroglobulin**

1. GRGHAR**LHVVEEPHTETVR**KYFPET
2. EELSL**KLPPNVVEESARASVSVL**

### **L1CAM (single-pass)**

1. ANL**KVKDATQITQGPR**STIEK
2. DVVESRA**QLLVGSPGPVPR**LVLSL
3. TSTTL**KLSPYVHYTFR**VTAINK

### **ADAM10 (single-pass)**

1. HQR**AKRAVSHEDQFLRLDFHAH**
2. GFIQTR**GGTFYVEPAERY**IKDRT

### **CD82 (multi-pass)**

1. WILAD**KSSFISVLQTSSSSLR**MGAYVF

### **Glypican-1 (lipid-anchor, GPI-anchor)**

1. QIYGAK**GFSLS**DVP**QAEISGEHLRI**CPQGY
2. ENLANR**SHAELETALRDSSRVL**
3. AFVAAR**SFVQGLGVASDVVR**KVAQVP

### **TSG101 (peripheral)**

1. VDANGKI**YLPYLHEWKHPQSDL**
2. SEDTIR**ASLISAVSDKLR**WRMK
3. GEALRR**GVIDLDVFLKHVRLS**

### **Flotillin-1 (peripheral)**

1. EVNTRRAQADLAYQLQVAKTKQQIE
2. ASVRMRGEAEFAIGARARAEAE
3. TMGAAKVTGEVLDILTRLPESEV

### **EHD4 (peripheral)**

1. PNQVLKSISVIDSPGILSGEKQRISRG
2. LFDAAHKLDISDEFSEAIKAFRGQD
3. RELISRLPEIYIQLQREYQISA

### **Moesin (peripheral)**

1. DRLTPKIGFPWSEIRNISFND
3. KPIDKKAPDFVFYAPRLRINKR

**EXO2** - Number of amino acids: 493; Molecular weight: 55528.5; Theoretical pI: 5.52  
Grand average of hydrophobicity (GRAVY): -0.537

MSTLDNRTIVITSHPGQIVKHGDIKALIIEFKVNFPENGFLSPDKLSLLEKITFPKEGDQTS  
NNIPADIVFVLKDKPHNIFKRDGSDVIYPARISLREACTPEKRGDLIIEFVIFPERIPQTS  
RYGEFYKSLTNDWEDHLAVKHFSVEGIGITKADLNNLGTIAKSGTKAFEKERDKEVSD  
DEAEKEDKEEEYLNFIKRVVDSDELPLNISREILQQSITRARRFEELNADLFRGTLDPVIP  
KIQKLLQDFFNGKELNKSITGETKDQVANSASFVERLRKHGLNDQGNRTTPSYVAFTDT  
ERLIGDAAQRQATKDAGTIAGLNVLRIINEPTAGIFEVKSTAGDTHLGGEDFDNRIVNHFI  
KEIFLRELISNASDALDKIRYESLTDPSKLDGKELKIDIIPNPQERTLTLVDGIGITKADLI  
NNLGTIAKSGTKAFLALRKGESGQSWPRLTKERAKLNWLSVDFNNWKDWEDDSKLA  
AALEHHHHHH

Peptides (marked red) with 6 a.a. residues flanking sequences on both sides (marked black) from 6 proteins listed below were randomly concatenated in EXO2 sequence. 3 Cys were replaced with Ala (marked green) and 4 Met were replaced with Ile (marked blue) in the flanking sequences. 6 x His tag and linker sequence (marked orange) was from expression vector.

### **DNAJA1 (hDj-2)**

1. STLDNRTIVITSHPGQIVKHGDIKC
2. LIIEFKVNFPENGFLSPDKLSLLEK

### **DNAJB1 (Hsp40)**

1. KITFPKEGDQTSNNIPADIVFVLKDKPHNIFKRDGSDVIYPARISLREA
2. KTPEKRGDLIIEFVIFPERIPQTSR

### **HSP90AA1**

1. GIGMTKADLNNLGTIAKSGTKAF
2. EKERDKEVSDDEAEKEDKEEE
3. YGEFYKSLTNDWEDHLAVKHFSVEG
4. YLNFIKRVVDSDELPLNISREMLQQS
5. ITGETKDQVANSASFVERLRKHGL

### **HSP90AB1**

KEIFLRELISNASDALDKIRYESLTDPSKLD SGKELKIDIIPNPQERTLTLVDGIGMTKADLI  
NNLGTIKSGTKAF

**HSPA8 (Hsc70)**

1. NDQGNRTTPSYVAFTDTERLIGDAA
2. QRQATKDAGTIAGLNVLRIINEPTA
3. GIFEVKSTAGDTHLGGEDFDNRMVNHFI
4. SITRARFEELNADLFRGTLDPV
5. IPKIQKLLQDFFNGKELNCSI

**PTGES3 (p23)**

1. LCCLRKGESGQSWPRLTKERAKLNWLSVDFNNWKDWEDDS

**Figure S2.** A 9 % SDS-PAGE of purified EXO1 (1) and EXO2 (2). The molecular mass standards in kDa are shown on the *left*.

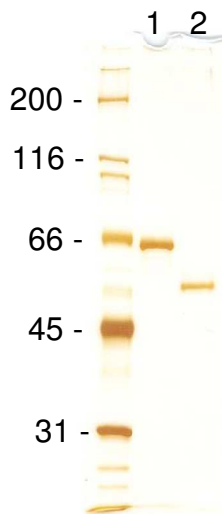

**Figure S3.** Scheme depicting basic and precipitation-based protocols.

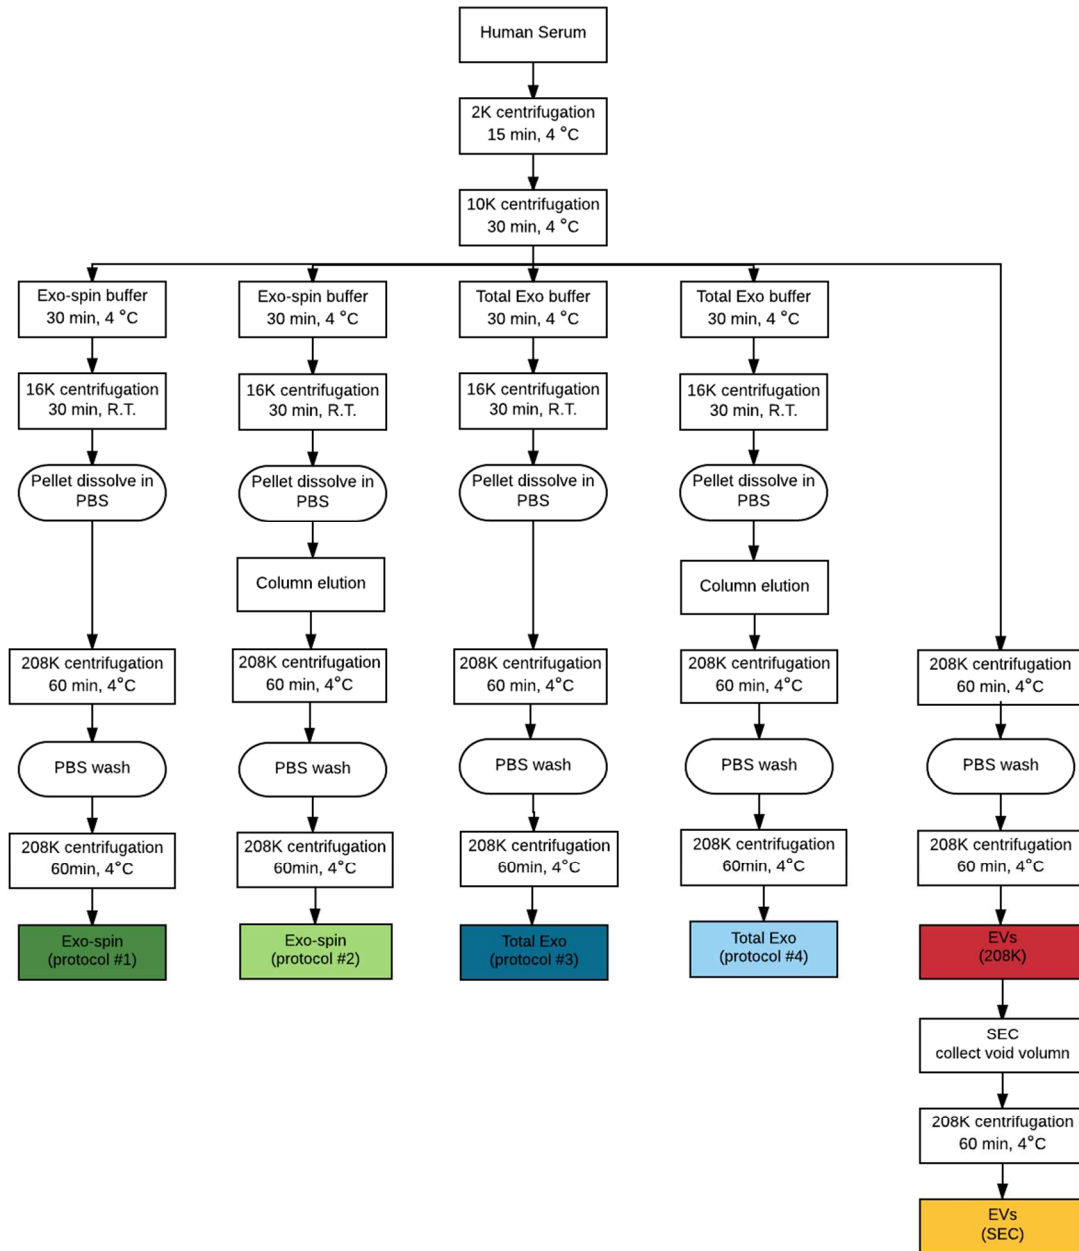

Supplement: NIHMS923389-supplement-Sup1.pdf [file NIHMS923389-supplement-Sup1.pdf]
